# Supplementary material for: Modeling Focal Epileptic Activity in the Wilson–Cowan Model with Depolarization Block
Source: PubMed Central journal article supplement (PMC4385301; doi:10.1186/s13408-015-0019-4), 2015-03-27

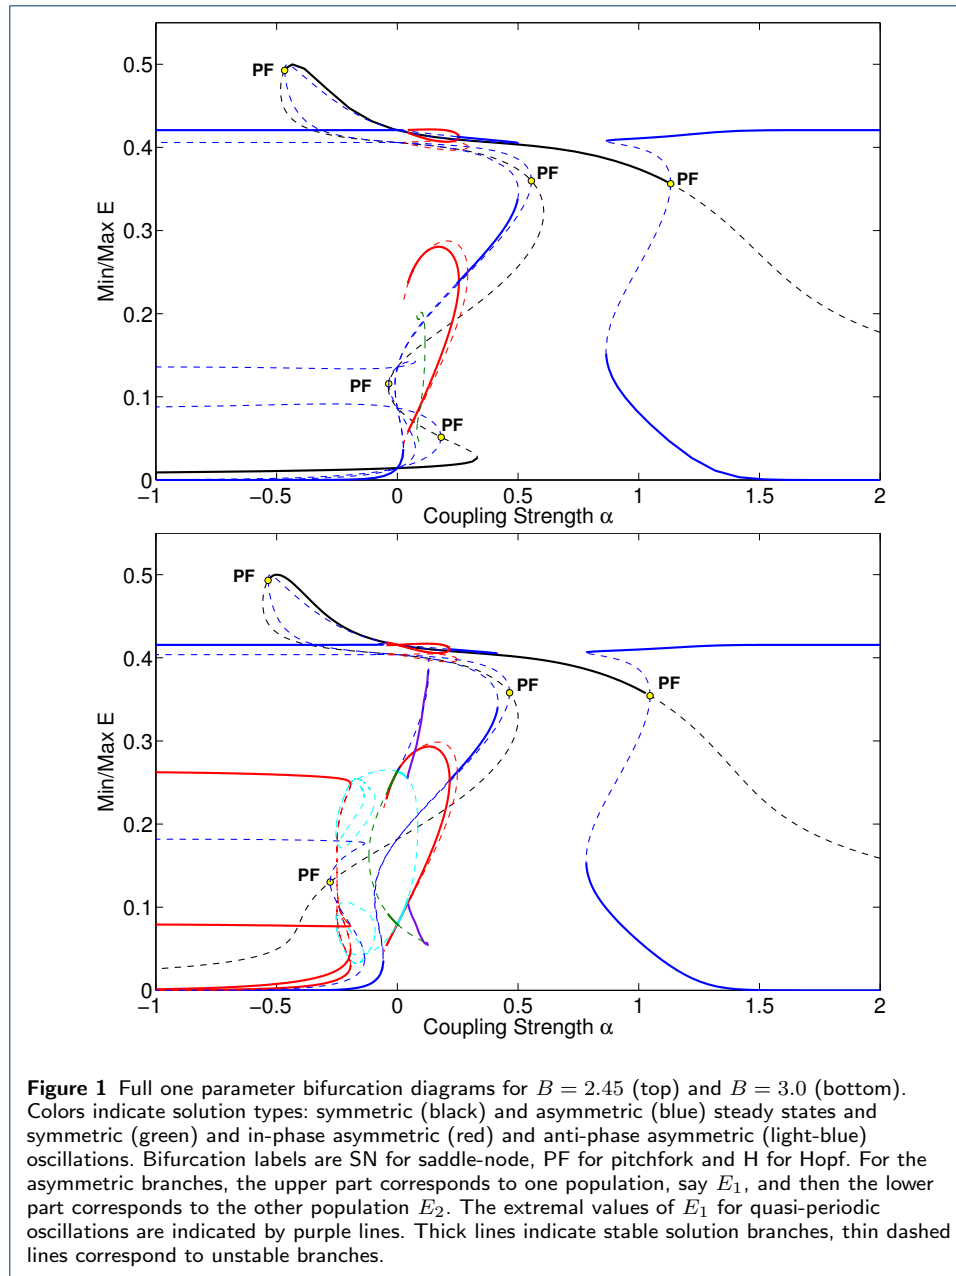

Supplement: 13408_2015_19_MOESM1_ESM.pdf [file 13408_2015_19_MOESM1_ESM.pdf]
